# Supplementary material for: Synthesis, surface activities, and aggregation behavior of phenyl-containing carboxybetaine surfactants
Source: Royal Society of Chemistry journal article supplement (doi:10.1039/c8ra06217j), 2018-01-01
Supplement: c8ra06217j1.pdf [file c8ra06217j1.pdf]

## ***Supporting Information***

### **Synthesis, surface activities, and aggregation behavior of phenyl- containing carboxybetaine surfactants**

Shifeng Gao<sup>a</sup>, Zhaozheng Song<sup>a,\*</sup>, Di Zhu<sup>a</sup>, Fang Lan<sup>a</sup>, Qingzhe Jiang<sup>a, b,\*</sup>

<sup>a</sup> State Key Laboratory of Heavy Oil Processing, College of Science, China  
University of Petroleum, Beijing 102249, PR China

<sup>b</sup> School of International Trade and Economics, University of International Business  
and Economics, Beijing 100029, PR China

\*Corresponding author. Tel.: +86 1089733372

E-mail address: song@cup.edu.cn (Z.Z. Song), jiangqingzhe@163.com (Q.Z. Jiang).

### **Contents**

1. <sup>1</sup>H and <sup>13</sup>C NMR spectra of C<sub>n</sub>OBCb with *n* = 12, 14, 16, 18 and main intermediates.
2. Fluorescence spectra of C<sub>n</sub>OBCb (*n* = 12, 14, 16, 18)
3. Fluorescent image for C<sub>12</sub>OBCb solution
4. DLS data of C<sub>n</sub>OBCb (*n* = 12, 14, 16, 18)
5. The composition of the used formation brine

1.  $^1\text{H}$  and  $^{13}\text{C}$  NMR spectra of  $\text{C}_n\text{OBCb}$  with  $n=12, 14, 16, 18$  and main intermediates.

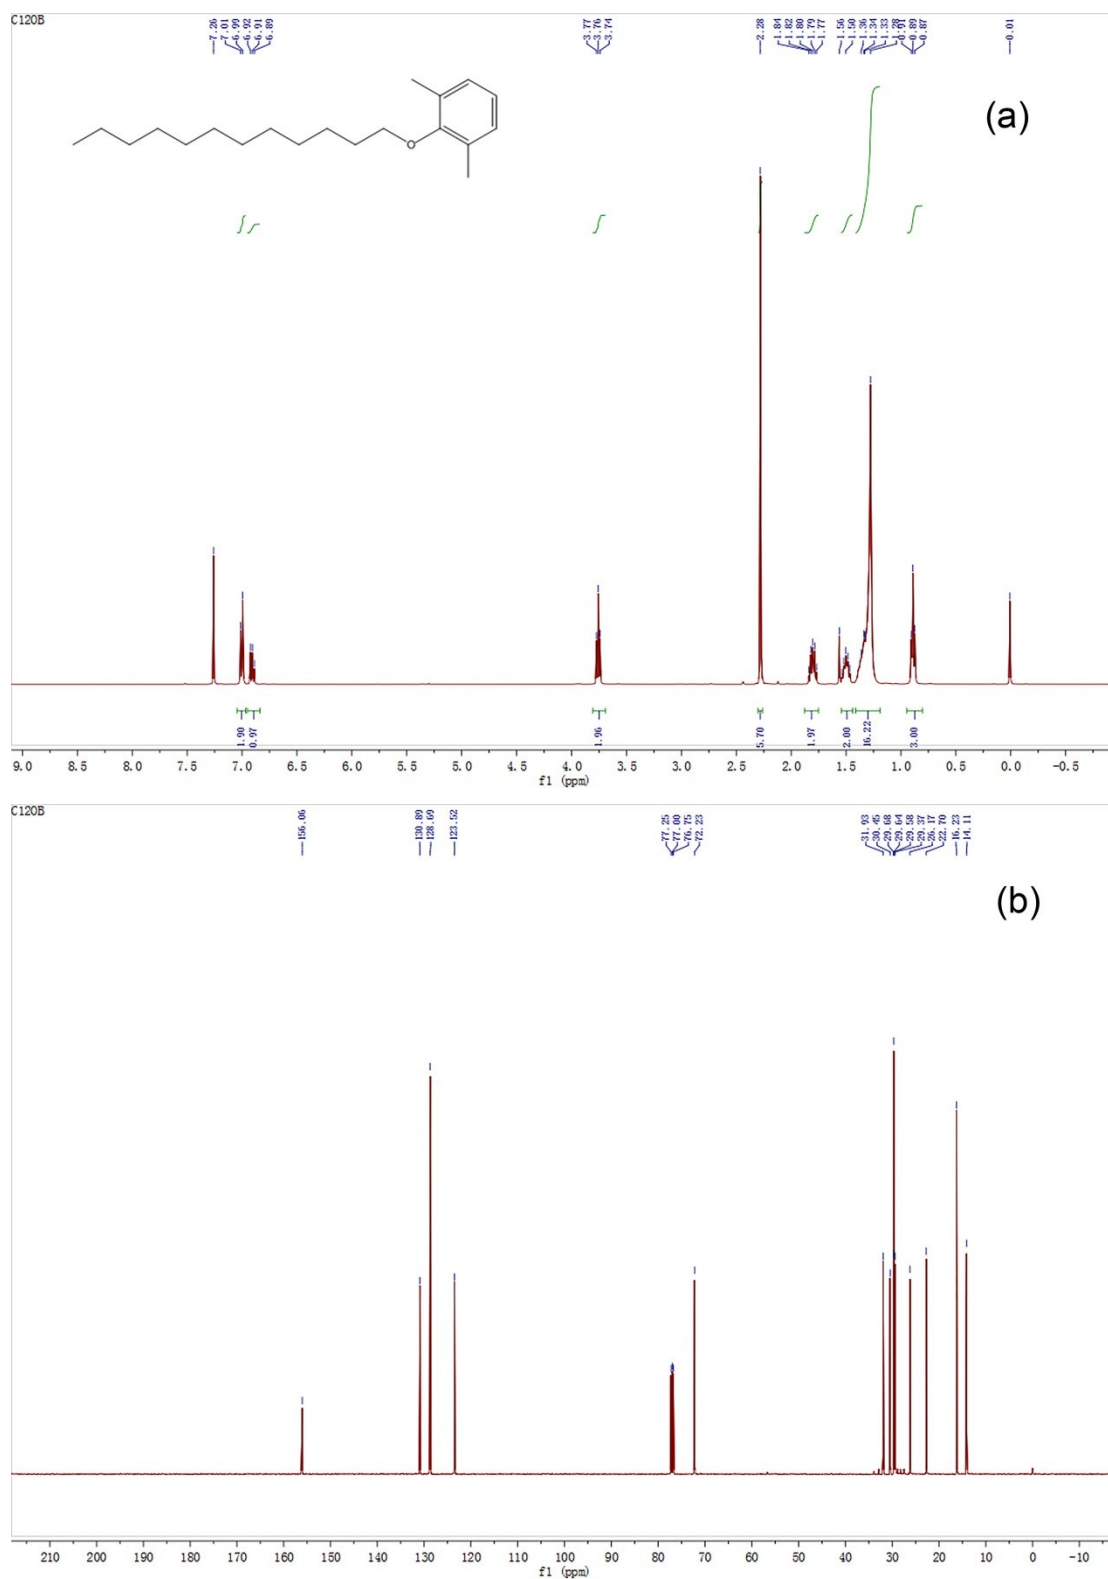

Fig. S1.  $^1\text{H}$  NMR (a) and  $^{13}\text{C}$  NMR (b) spectra of 2-(dodecyloxy)-1,3-dimethylbenzene ( $\text{C}_{12}\text{OB}$ ) in  $\text{CDCl}_3$ .

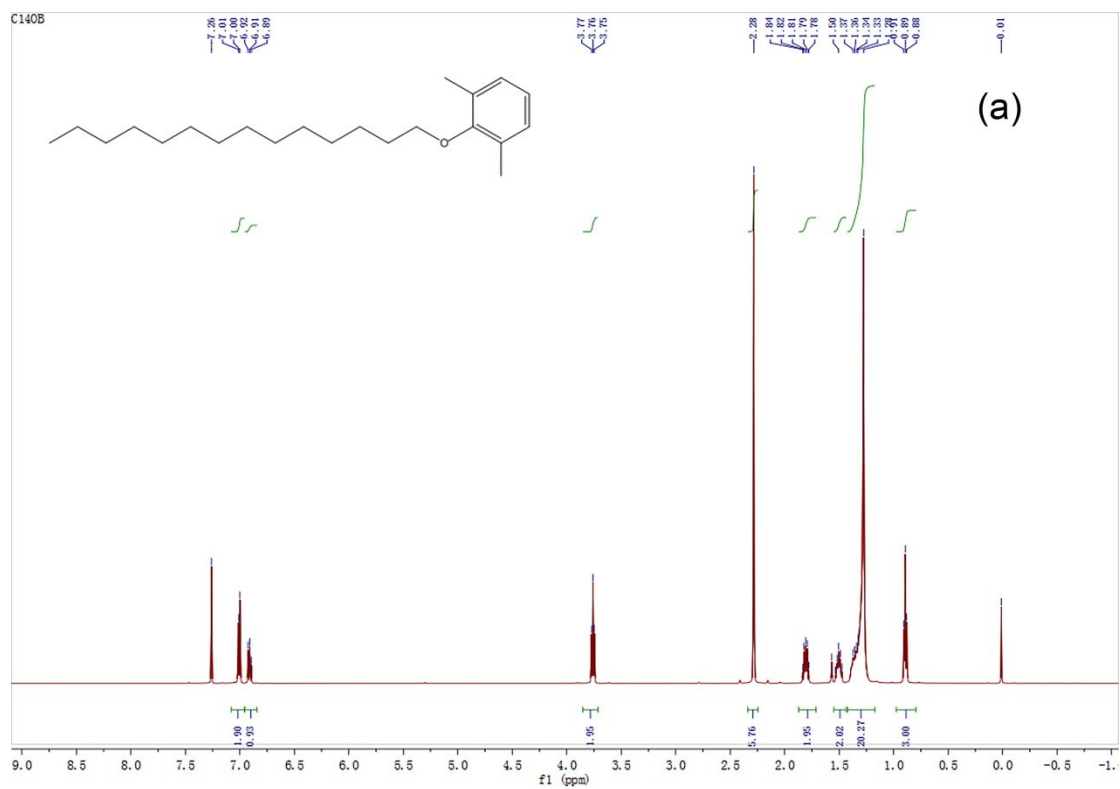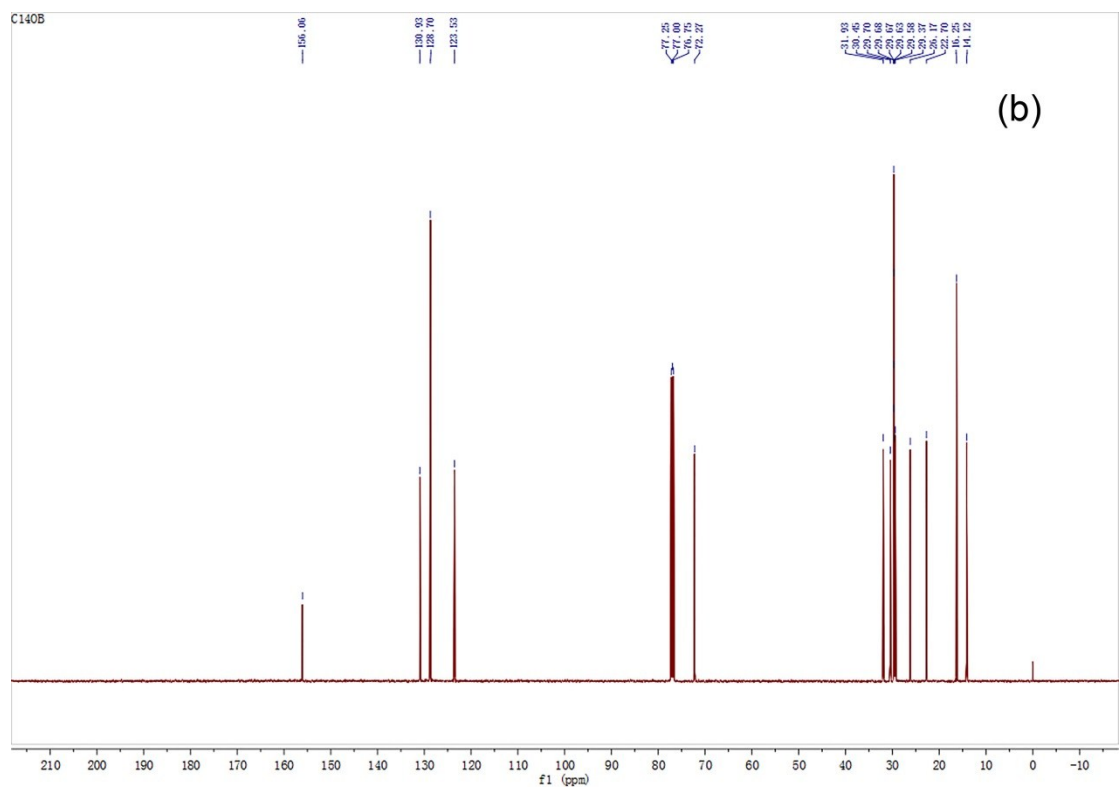

Fig. S2.  $^1\text{H}$  NMR (a) and  $^{13}\text{C}$  NMR (b) spectra of 2-(tetradecyloxy)-1,3-dimethylbenzene ( $\text{C}_{14}\text{OB}$ ) in  $\text{CDCl}_3$ .

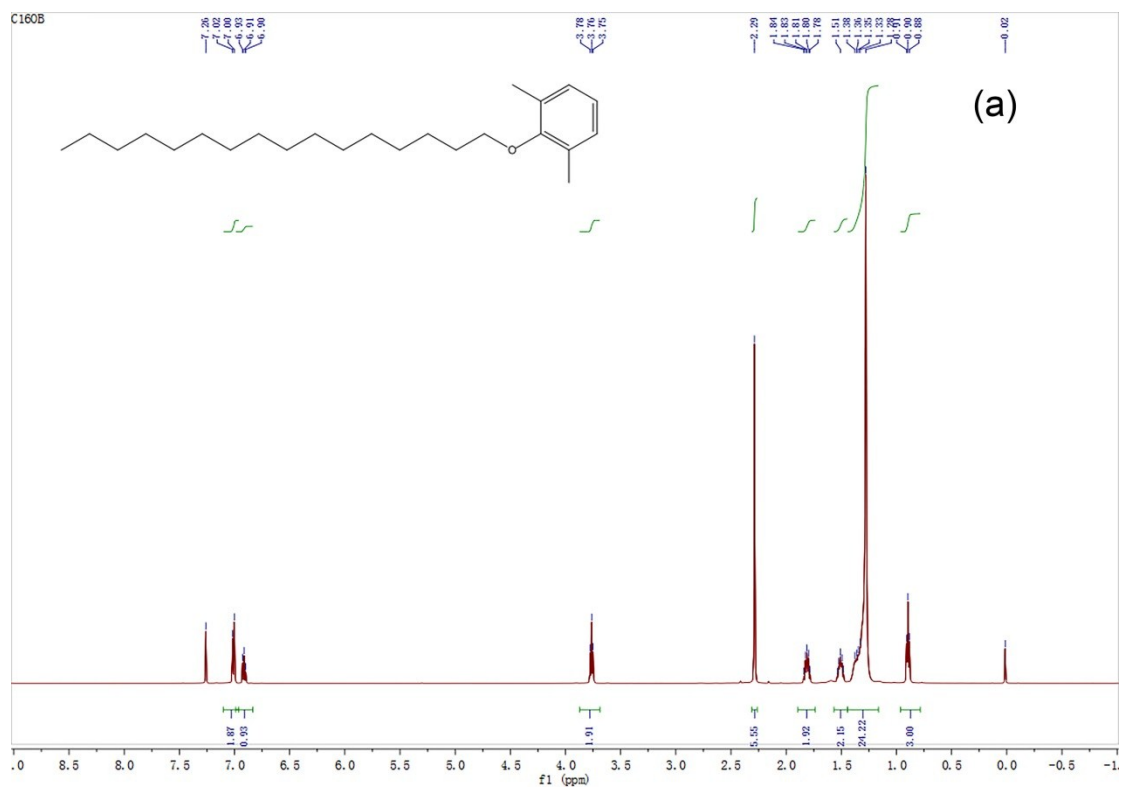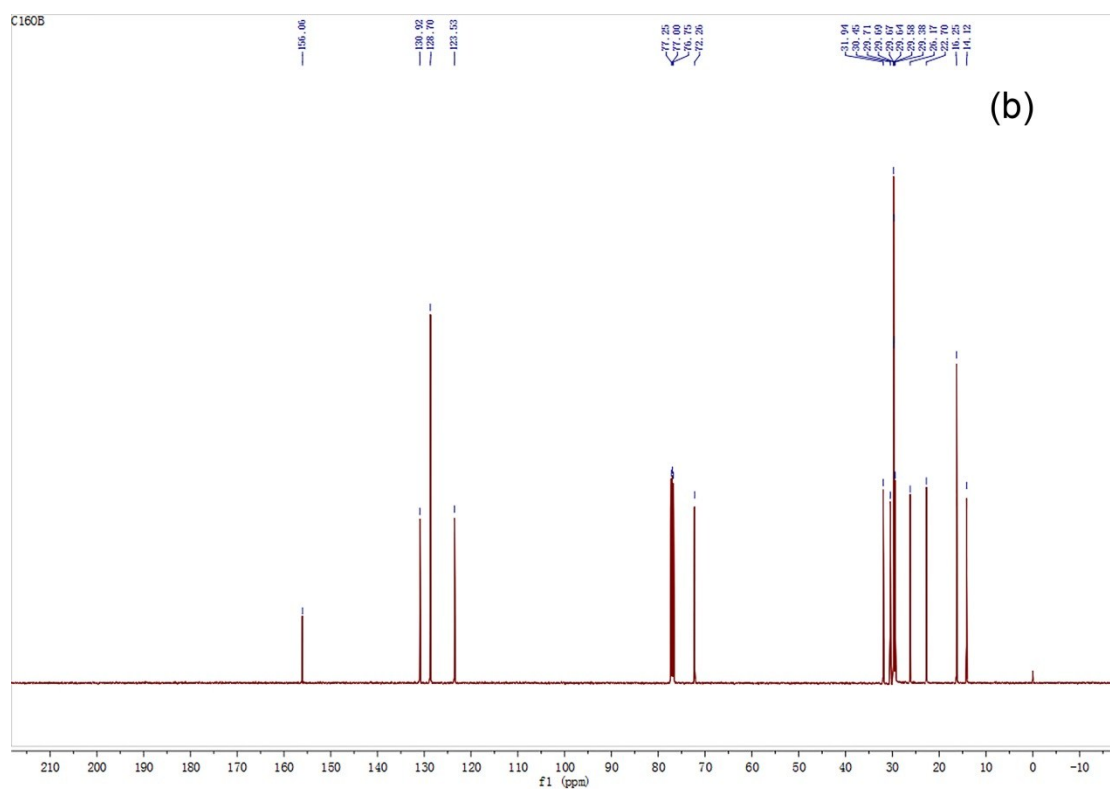

Fig. S3.  $^1\text{H}$  NMR (a) and  $^{13}\text{C}$  NMR (b) spectra of 2-(hexadecyloxy)-1,3-dimethylbenzene ( $\text{C}_{16}\text{OB}$ ) in  $\text{CDCl}_3$ .

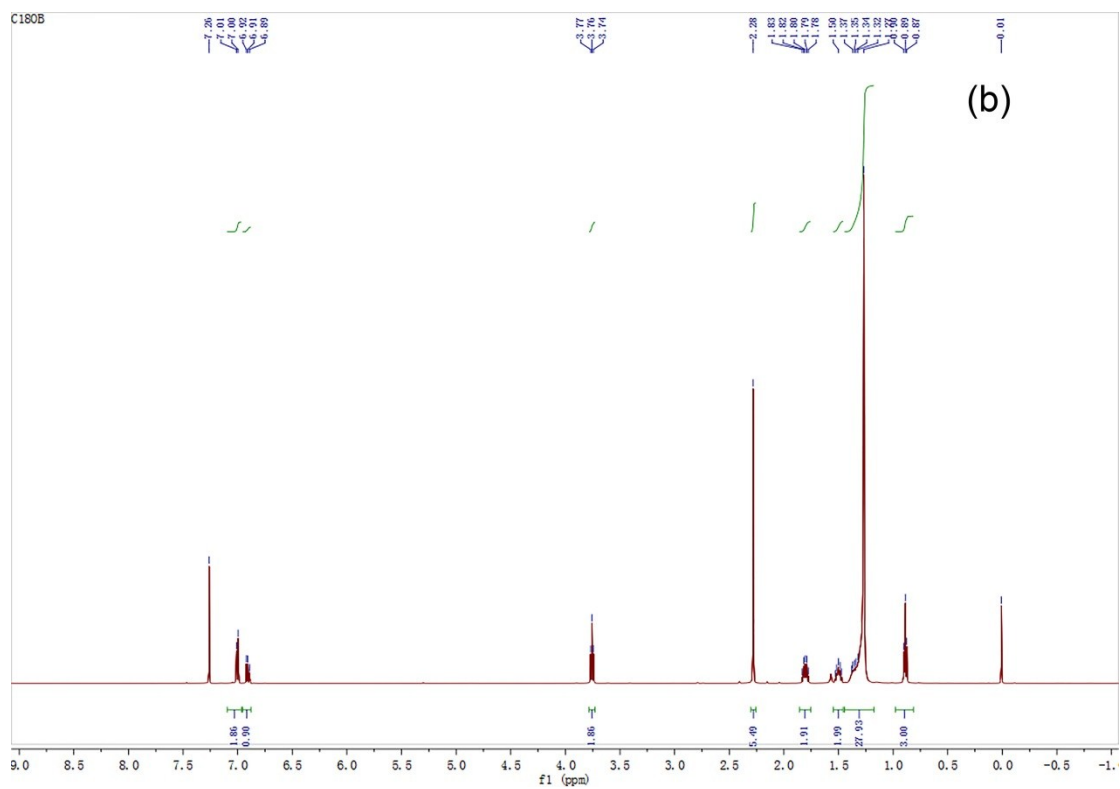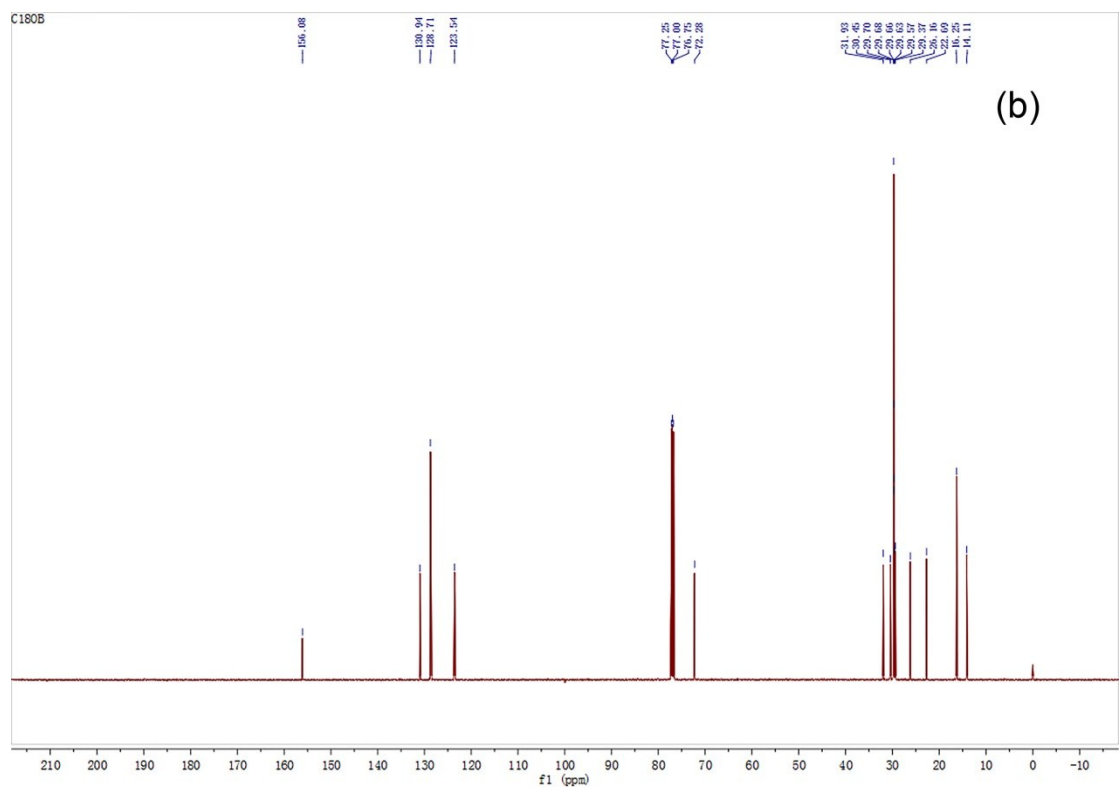

Fig. S4.  $^1\text{H}$  NMR (a) and  $^{13}\text{C}$  NMR (b) spectra of 2-(octadecyloxy)-1,3-dimethylbenzene ( $\text{C}_{18}\text{OB}$ ) in  $\text{CDCl}_3$ .

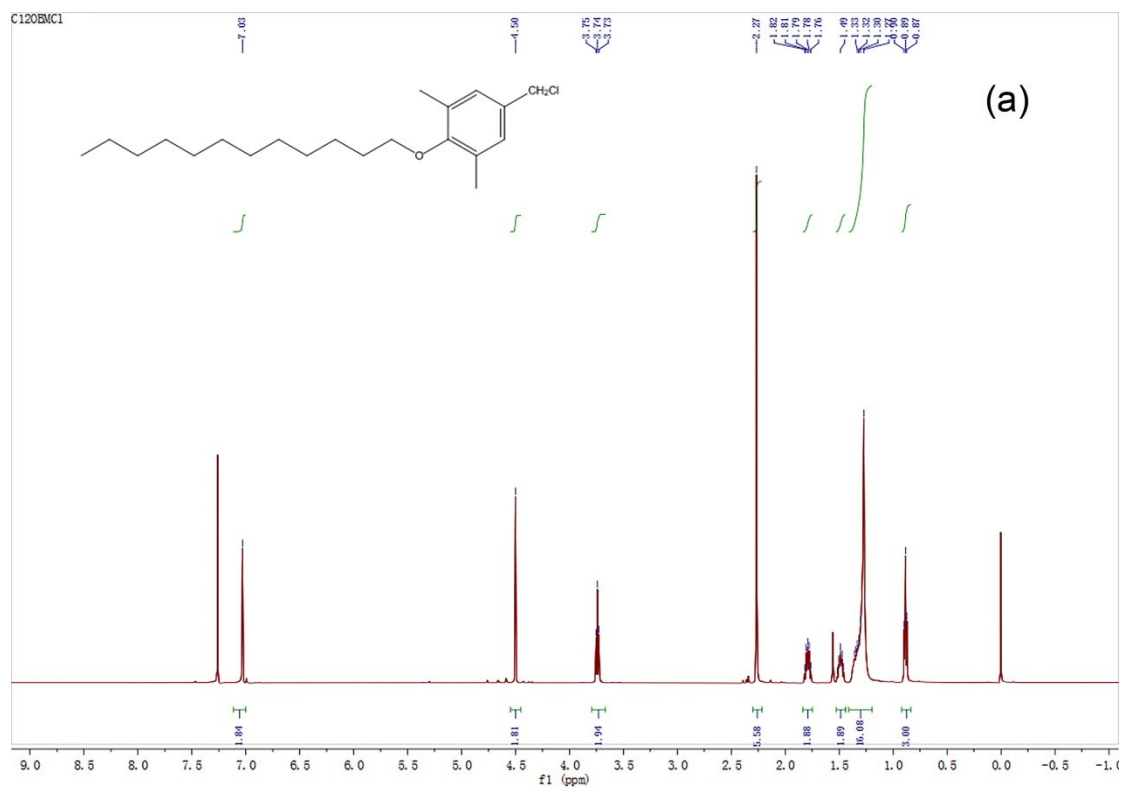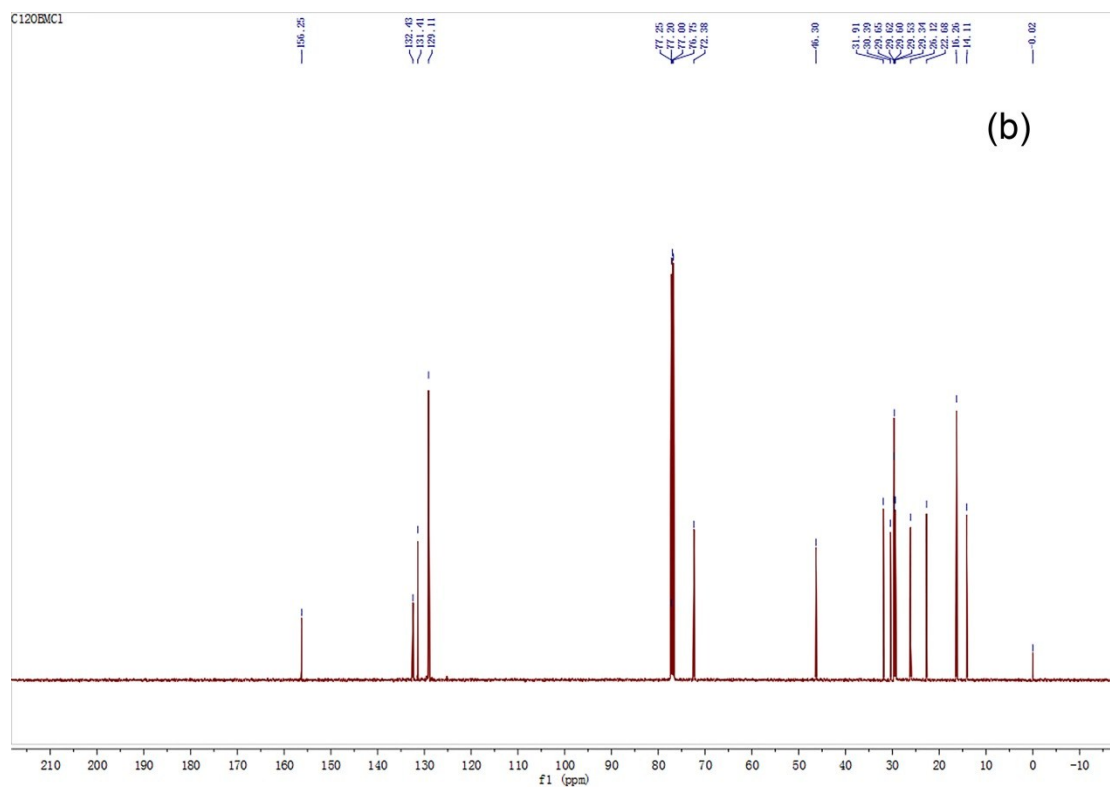

Fig. S5.  $^1\text{H}$  NMR (a) and  $^{13}\text{C}$  NMR (b) spectra of 5-(chloromethyl)-2-(dodecyloxy)-1,3-dimethylbenzene ( $\text{C}_{12}\text{OBMC1}$ ) in  $\text{CDCl}_3$ .

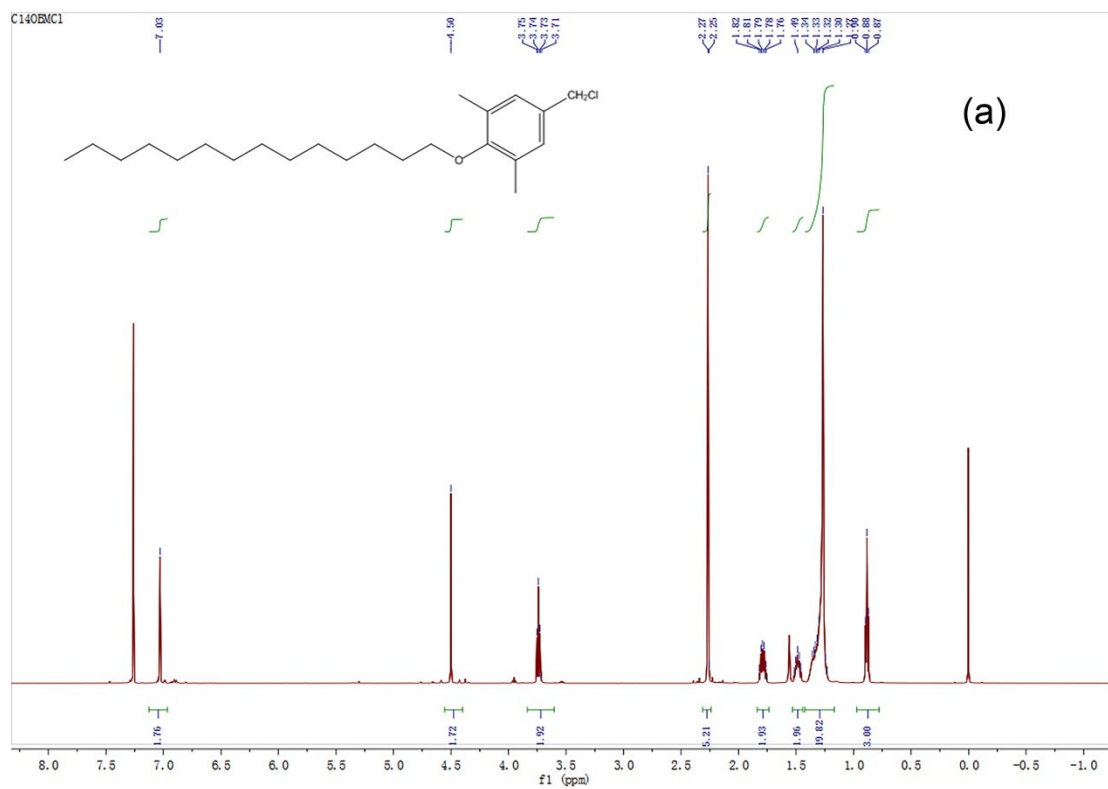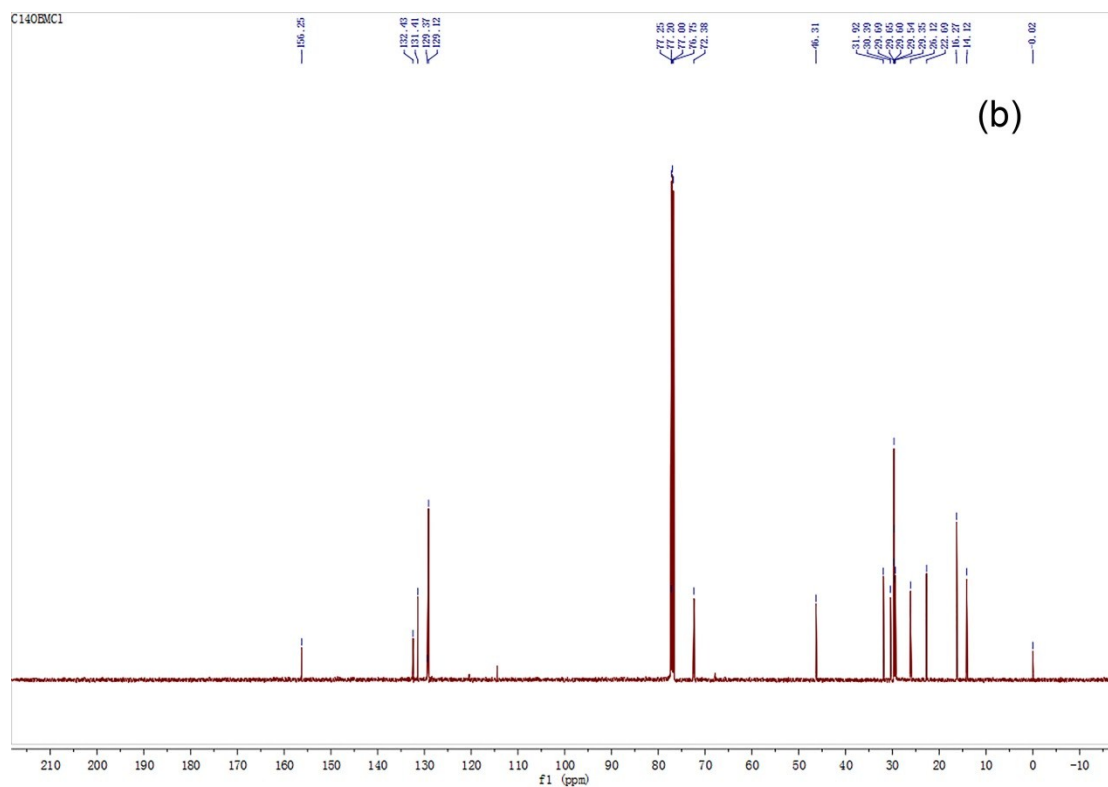

Fig. S6.  $^1\text{H}$  NMR (a) and  $^{13}\text{C}$  NMR (b) spectra of 5-(chloromethyl)-2-(tetradecyloxy)-1,3-dimethylbenzene ( $\text{C}_{14}\text{OBMC1}$ ) in  $\text{CDCl}_3$ .

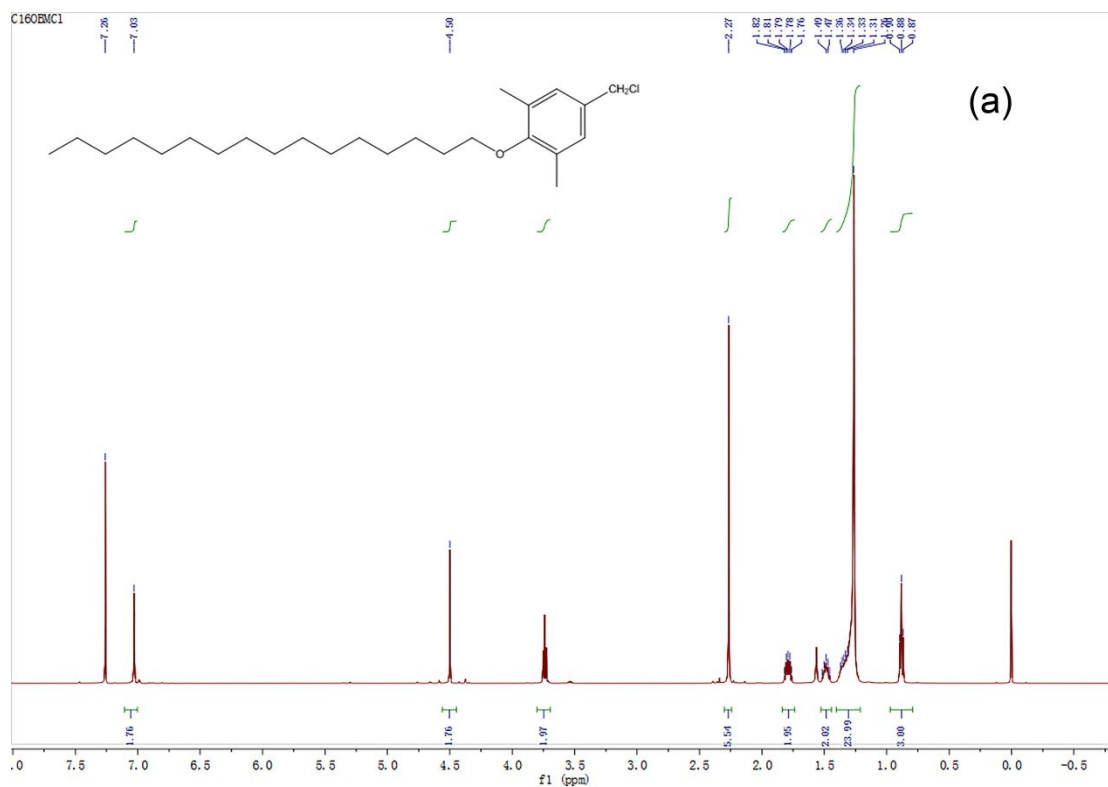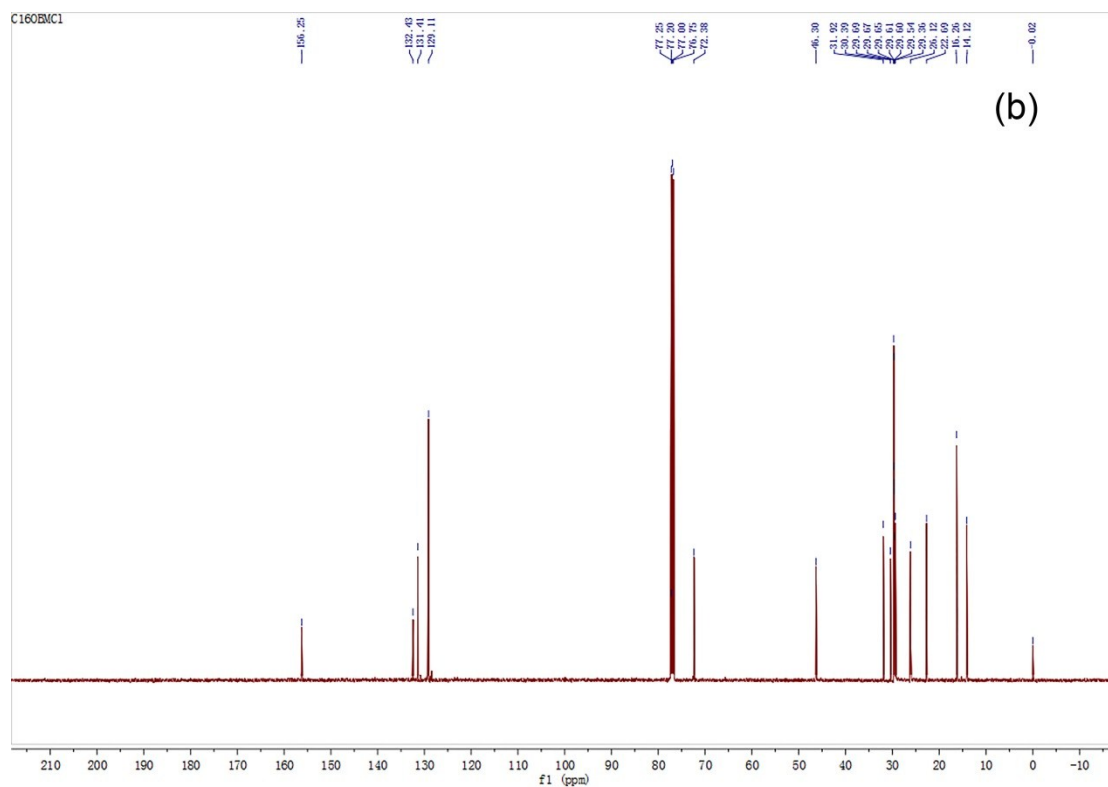

Fig. S7.  $^1\text{H}$  NMR (a) and  $^{13}\text{C}$  NMR (b) spectra of 5-(chloromethyl)-2-(hexadecyloxy)-1,3-dimethylbenzene ( $\text{C}_{16}\text{OBMC1}$ ) in  $\text{CDCl}_3$ .



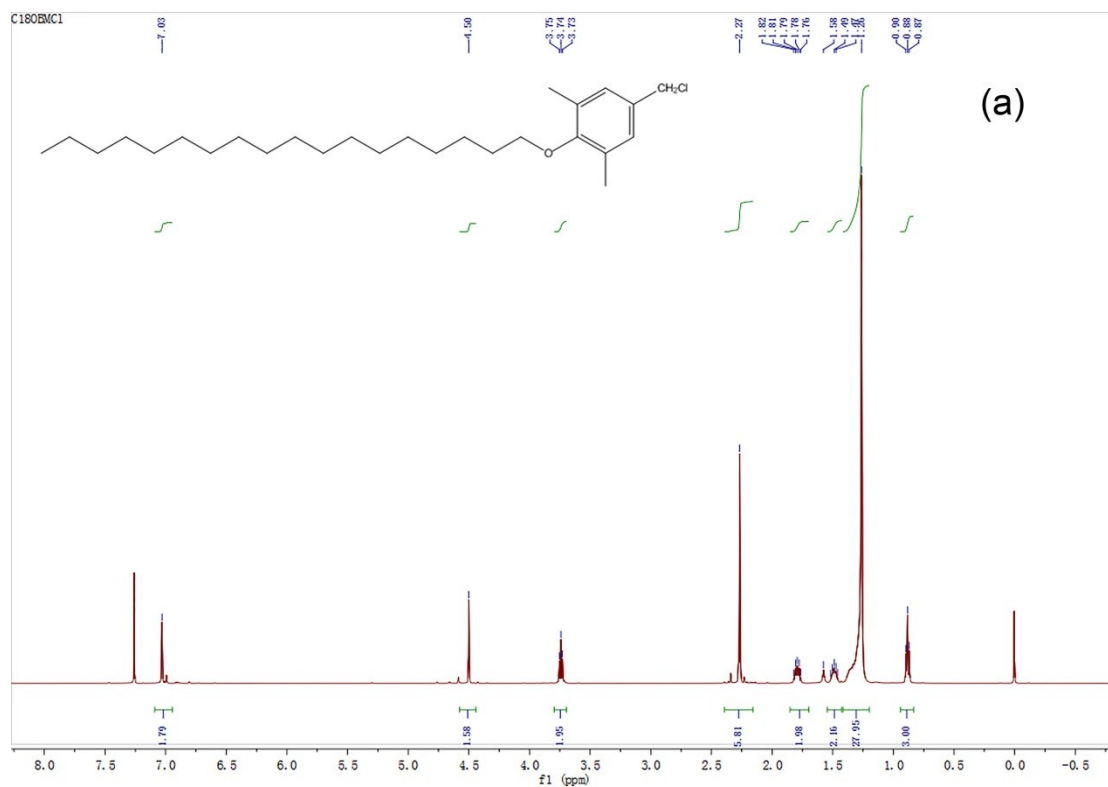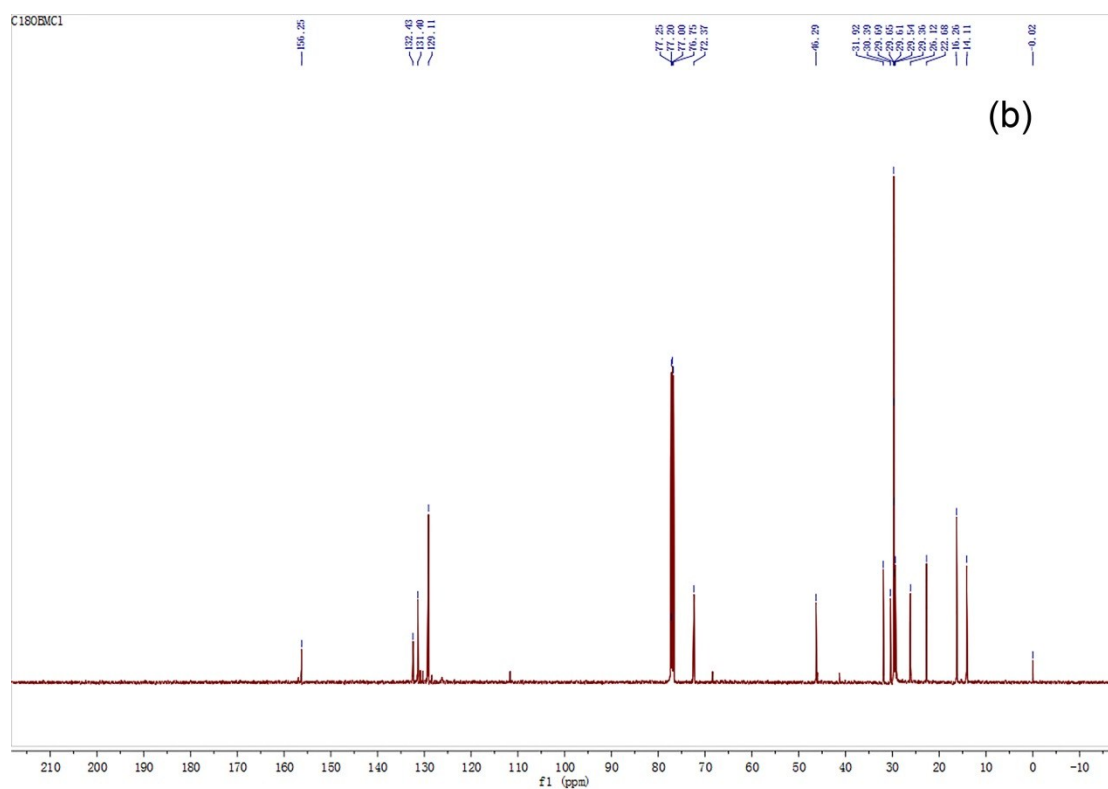

Fig. S8.  $^1\text{H}$  NMR (a) and  $^{13}\text{C}$  NMR (b) spectra of 5-(chloromethyl)-2-(octadecyloxy)-1,3-dimethylbenzene( $\text{C}_{18}\text{OBMCl}$ ) in  $\text{CDCl}_3$ .

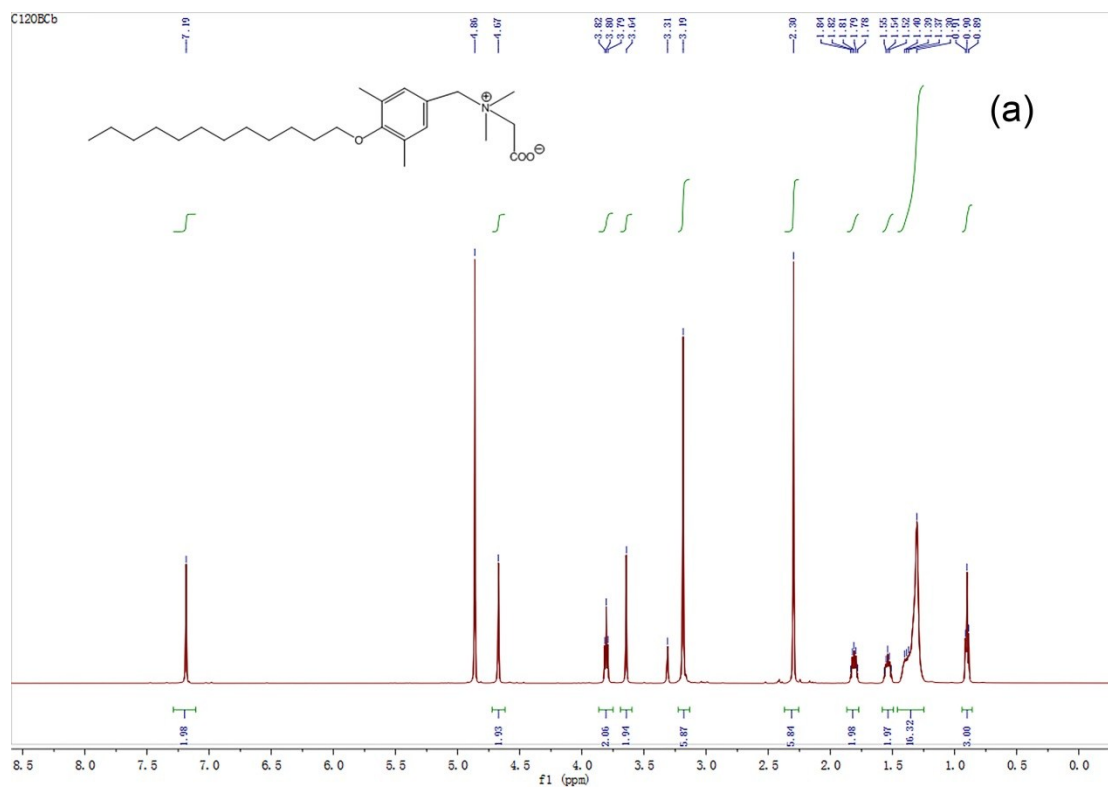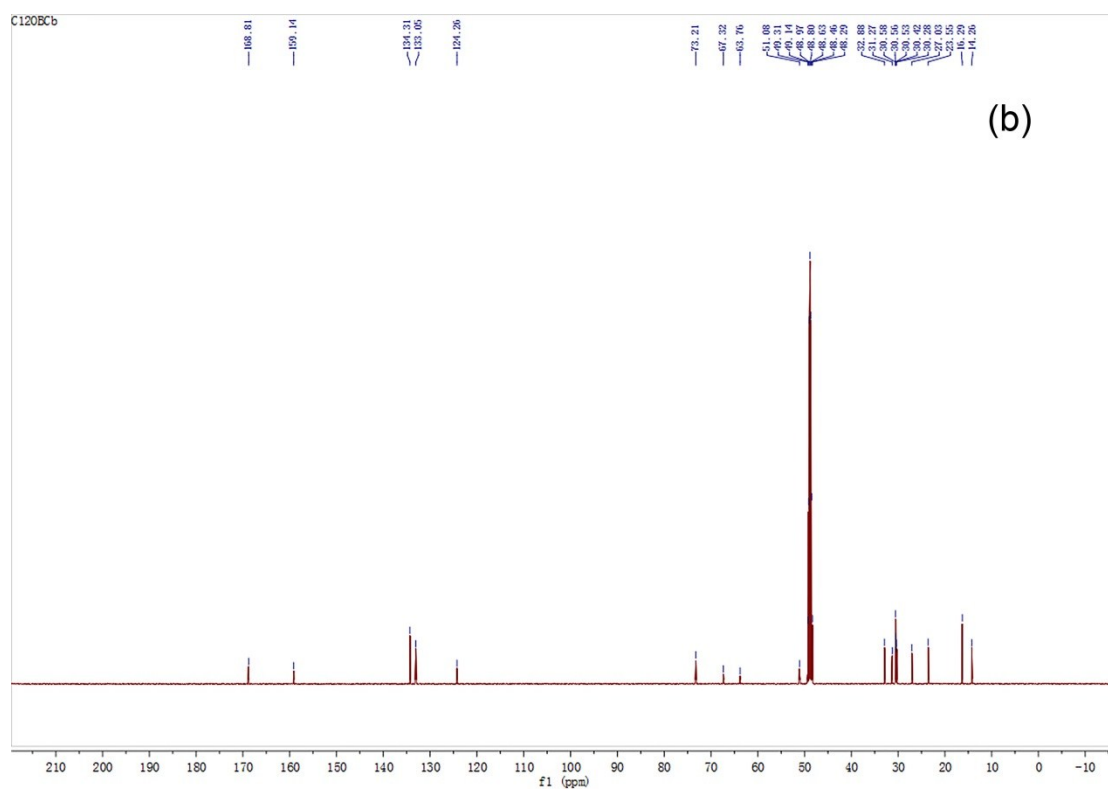

Fig. S9.  $^1\text{H}$  NMR (a) and  $^{13}\text{C}$  NMR (b) spectra of 2-((4-(dodecyloxy)-3,5-dimethylbenzyl)-dimethylammonio)acetate ( $\text{C}_{12}\text{OBCb}$ ) in  $\text{CD}_3\text{OD}$ .

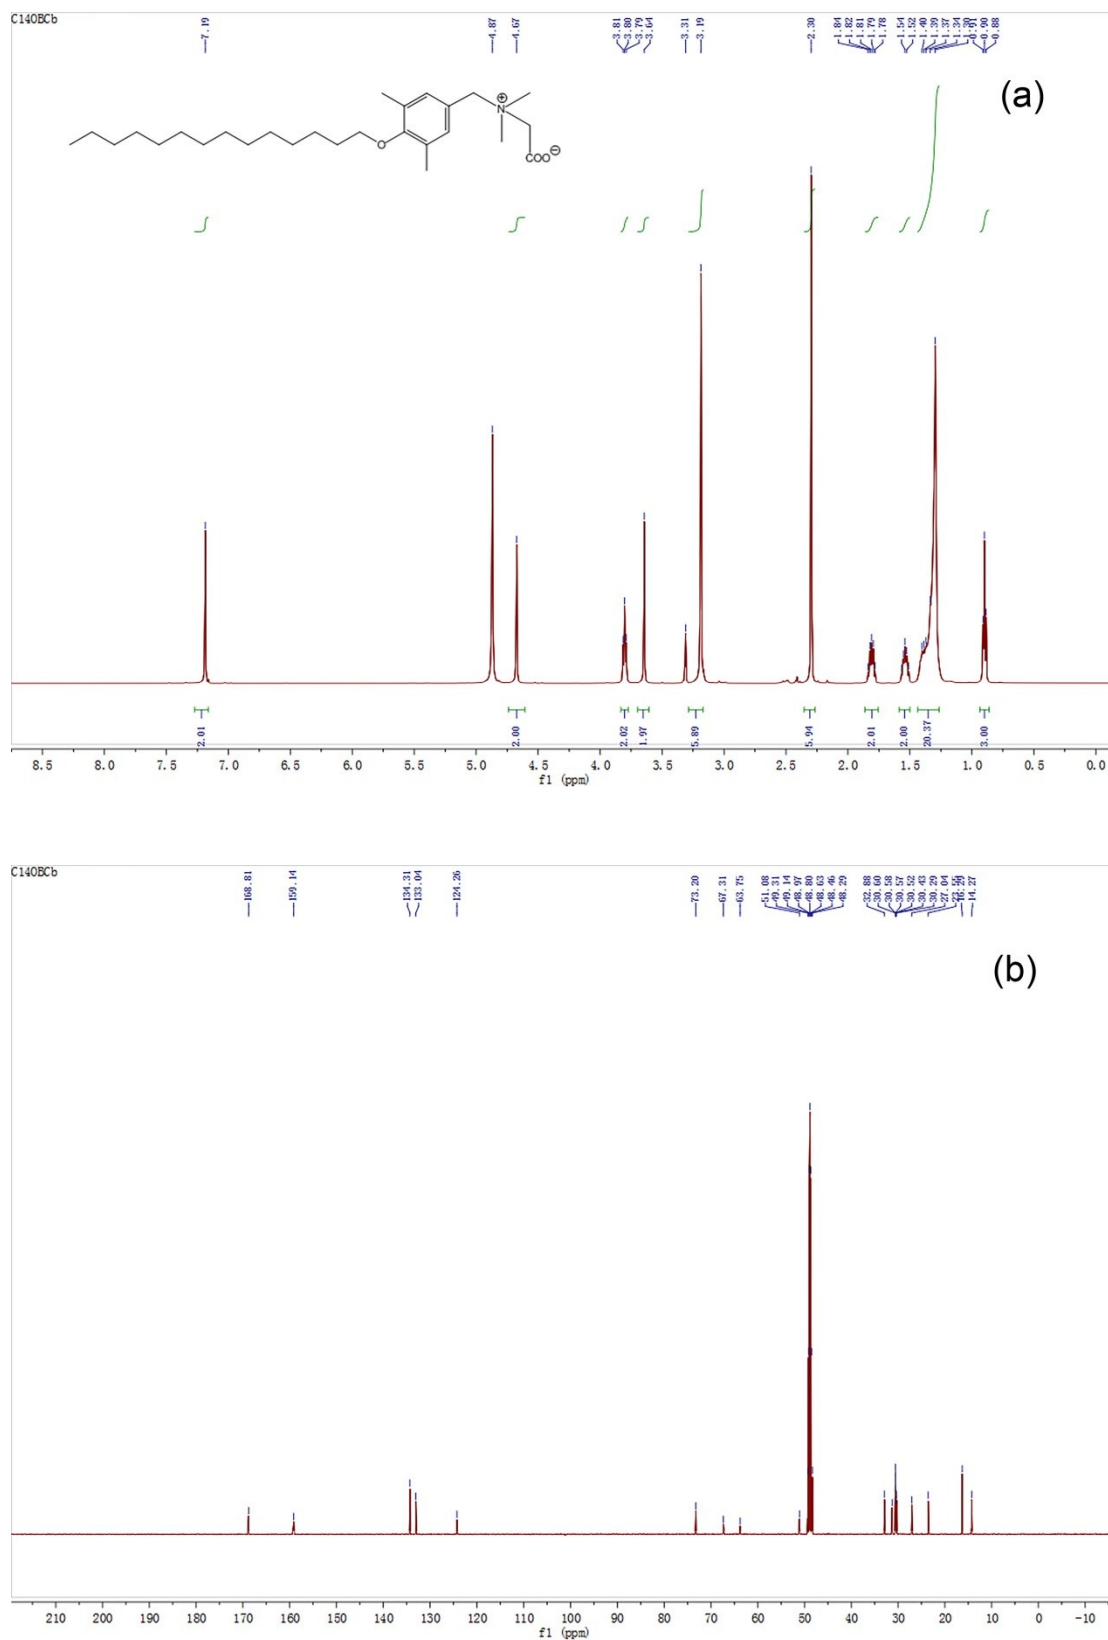

Fig. S10.  $^1\text{H}$  NMR (a) and  $^{13}\text{C}$  NMR (b) spectra of 2-((4-(tetradecyloxy)-3,5-dimethylbenzyl)-dimethylammonio)acetate ( $\text{C}_{14}\text{OBCb}$ ) in  $\text{CD}_3\text{OD}$ .

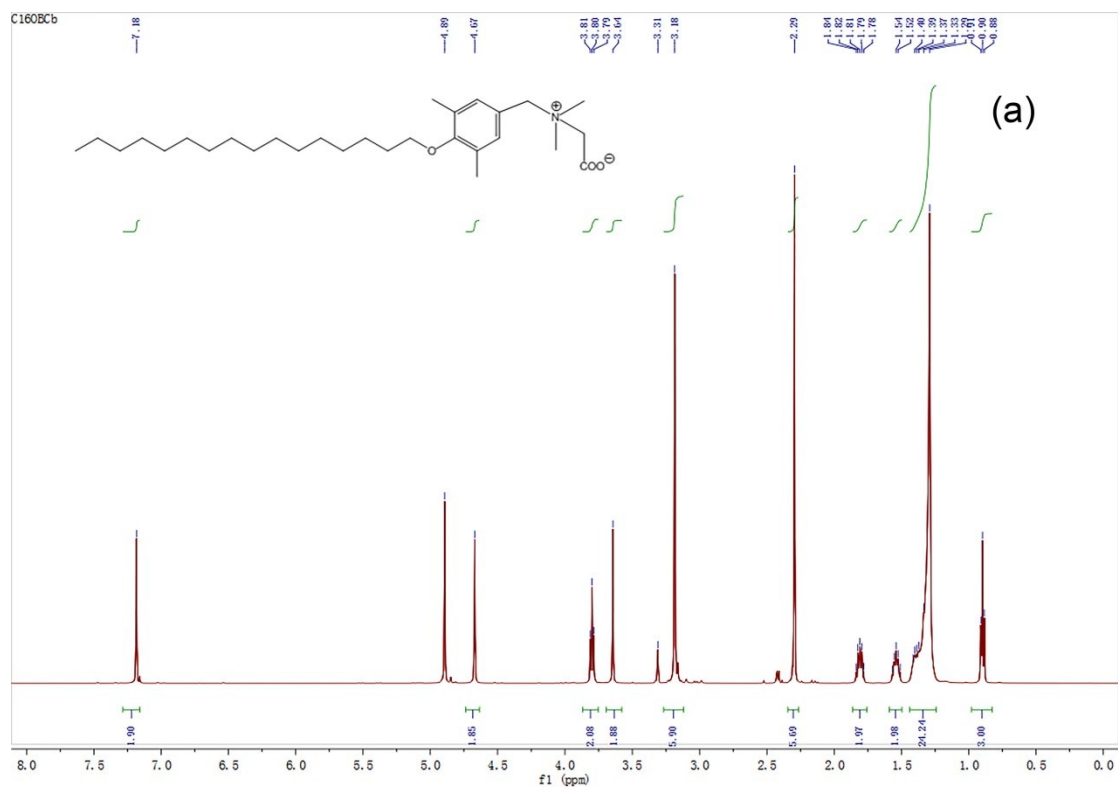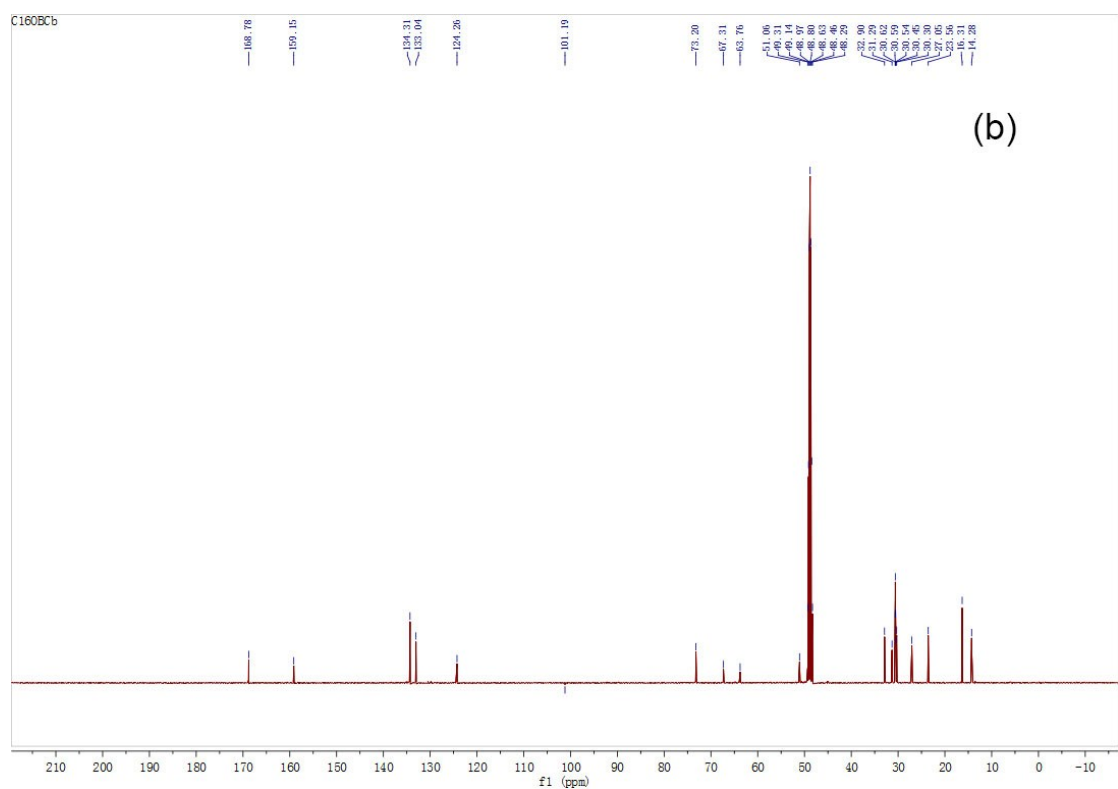

Fig. S11.  $^1\text{H}$  NMR (a) and  $^{13}\text{C}$  NMR (b) spectra of 2-((4-(hexadecyloxy)-3,5-dimethylbenzyl)-dimethylammonio)acetate ( $\text{C}_{16}\text{OBCb}$ ) in  $\text{CD}_3\text{OD}$ .

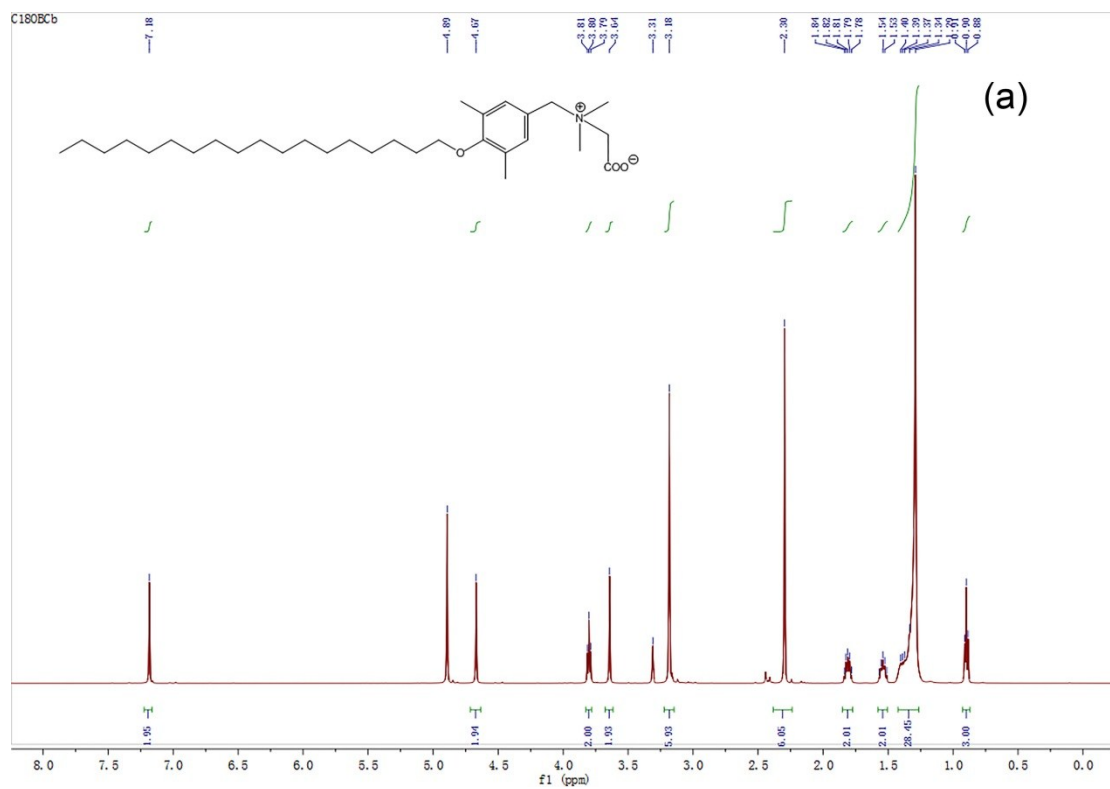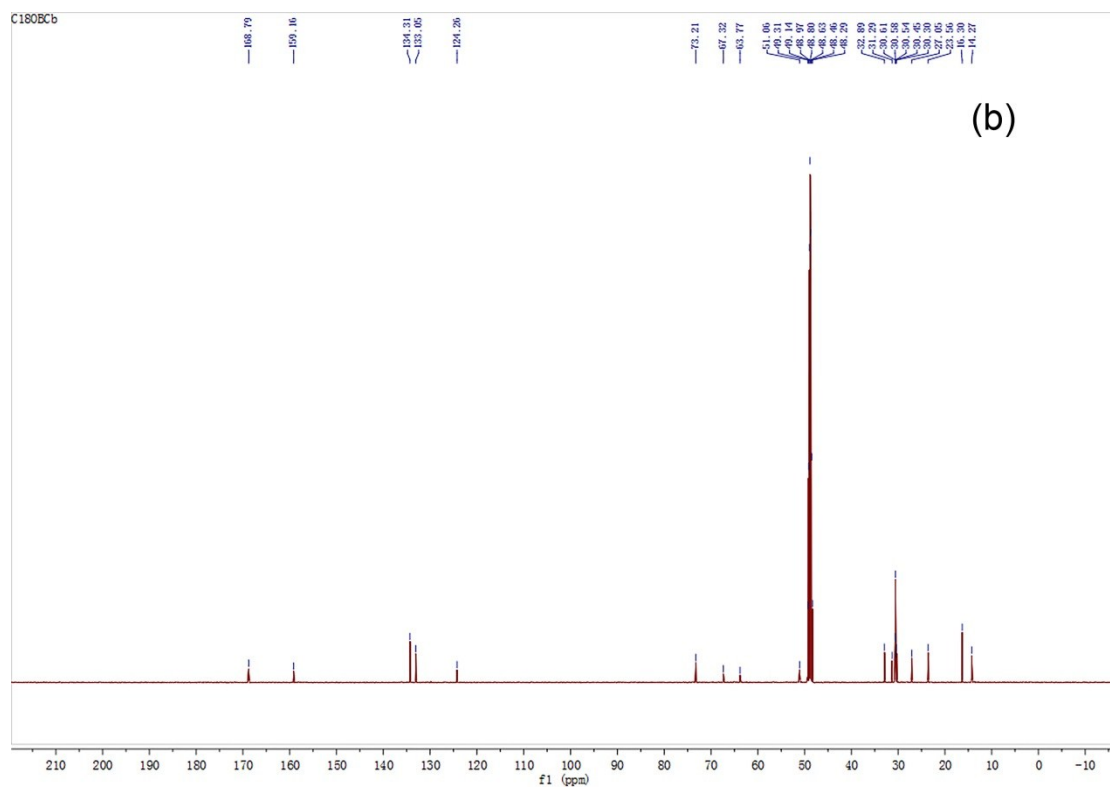

Fig. S12.  $^1\text{H}$  NMR (c) and  $^{13}\text{C}$  NMR (d) spectra of 2-((4-(octadecyloxy)-3,5-dimethylbenzyl)-dimethylammonio)acetate ( $\text{C}_{18}\text{OBCb}$ ) in  $\text{CD}_3\text{O}$ .

## 2. Fluorescence spectra of $C_n$ OBCb ( $n = 12, 14, 16, 18$ )

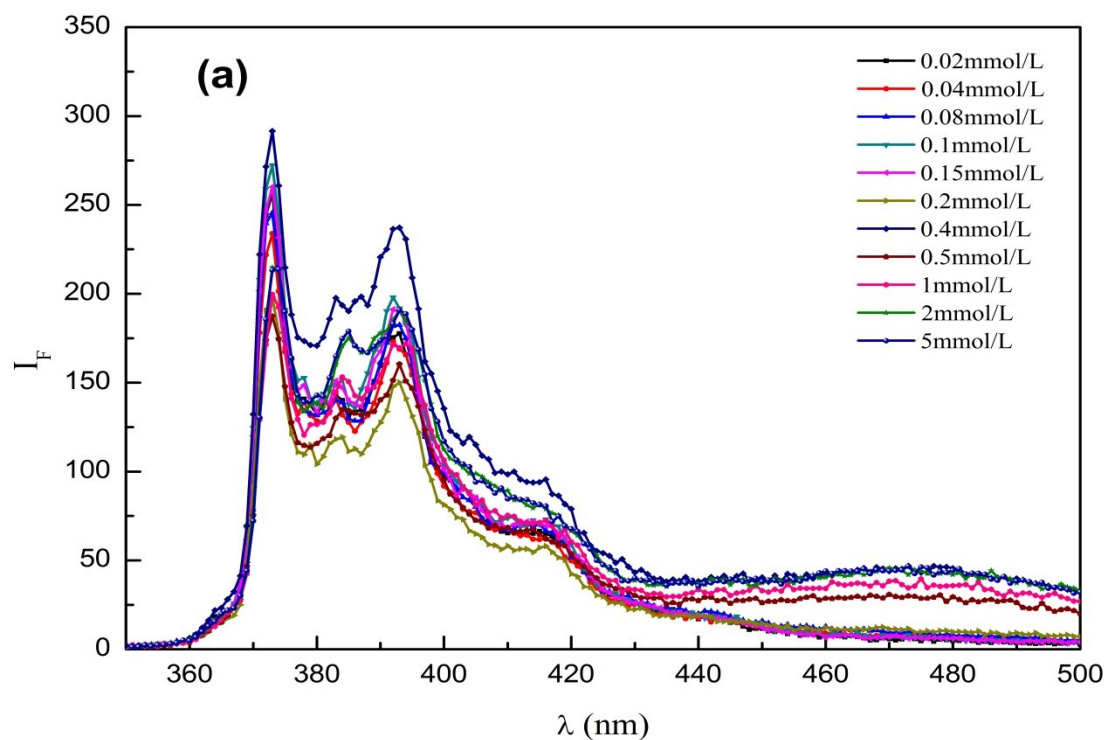

Fig. S13. Fluorescence spectrum of  $C_{12}$ OBCb

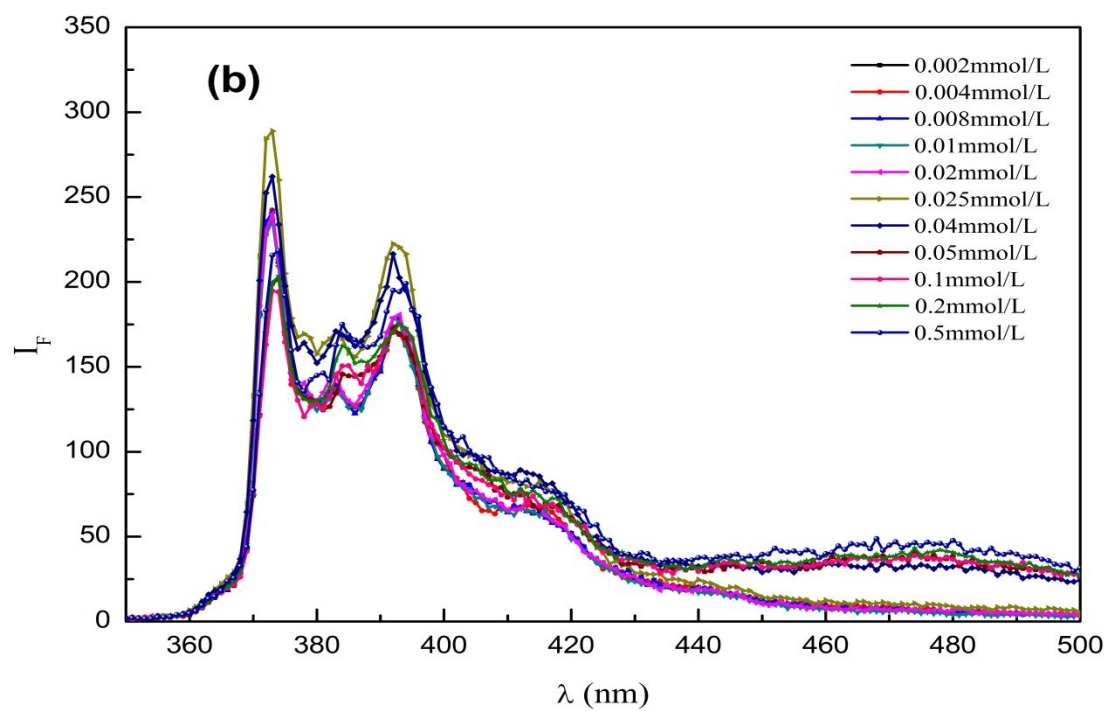

Fig. S14. Fluorescence spectrum of  $C_{14}$ OBCb

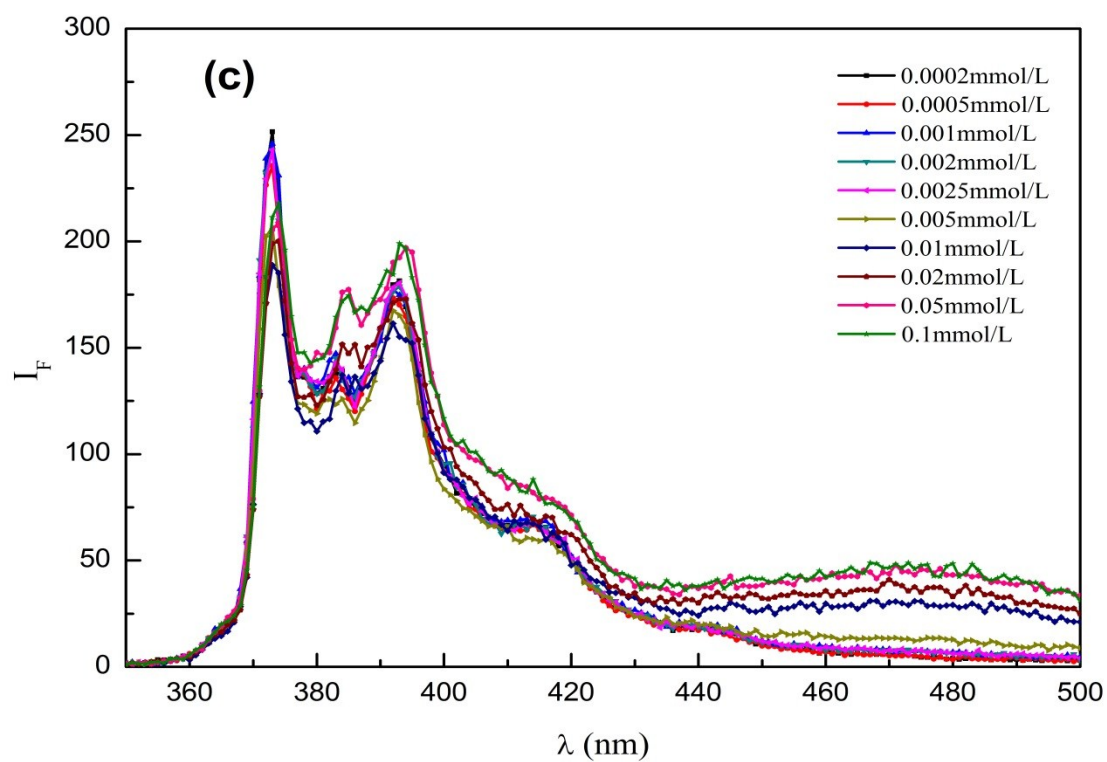

Fig. S15. Fluorescence spectrum of C<sub>16</sub>OBCb

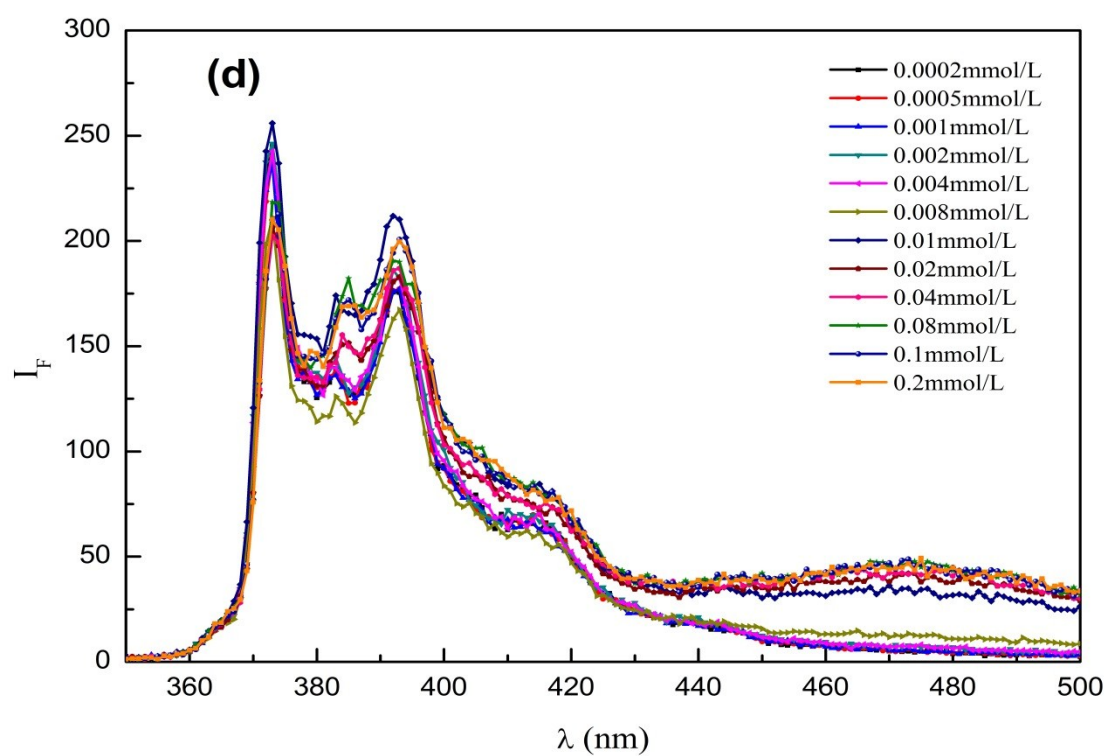

Fig. S16. Fluorescence spectrum of C<sub>18</sub>OBCb

### 3. Fluorescent image for C<sub>12</sub>OBCb solution

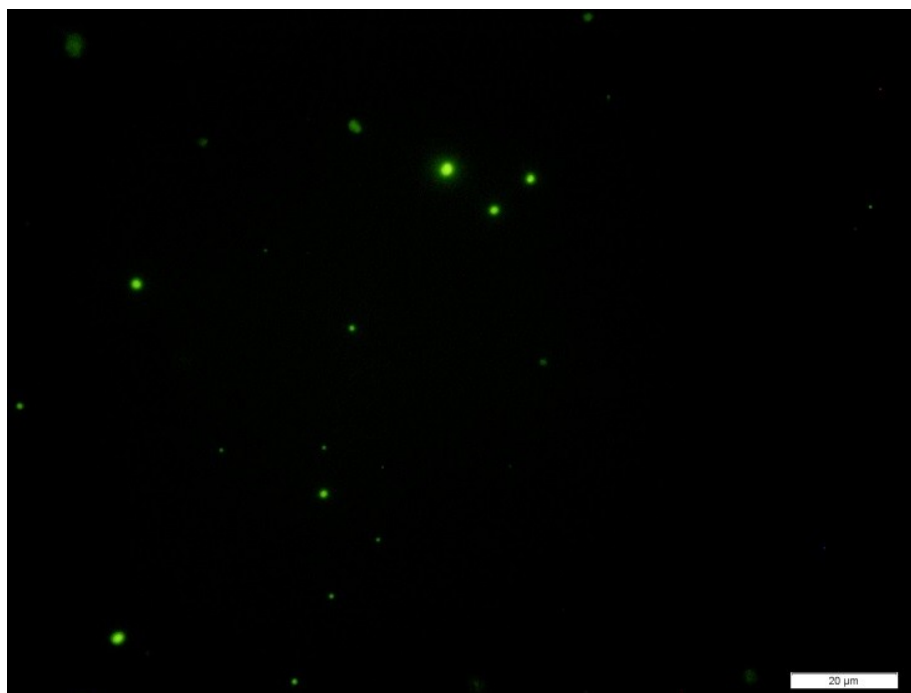

Fig. S17. Fluorescent image for C<sub>12</sub>OBCb solution (3.76 mmol dm<sup>-3</sup>) dyed with calcein.



#### 4. DLS data of C<sub>n</sub>OBCb (*n* = 12, 14, 16, 18)

Table S1 DLS data of C<sub>n</sub>OBCb

| Surfactant           | Concentration | PDI   | Peak1<br>/nm | I <sub>1</sub> /% | Peak2<br>/nm | I <sub>2</sub> /% |
|----------------------|---------------|-------|--------------|-------------------|--------------|-------------------|
| C <sub>12</sub> OBCb | 5×cmc         | 0.305 | 14.1         | 14.1              | 76.7         | 85.9              |
|                      | 10×cmc        | 0.369 | 24.7         | 20                | 93.5         | 80                |
|                      | 20×cmc        | 0.416 | 31.5         | 35.1              | 110.3        | 64.9              |
| C <sub>14</sub> OBCb | 5×cmc         | 0.263 | 16.9         | 9.7               | 82.1         | 90.3              |
|                      | 10×cmc        | 0.353 | 23.1         | 17.6              | 86.7         | 82.4              |
|                      | 20×cmc        | 0.394 | 32.6         | 41.6              | 110.6        | 58.4              |
| C <sub>16</sub> OBCb | 5×cmc         | 0.294 | 17.4         | 12.1              | 76.5         | 87.9              |
|                      | 10×cmc        | 0.330 | 26.4         | 15.2              | 98.8         | 84.8              |
|                      | 20×cmc        | 0.369 | 35.8         | 45.6              | 114.7        | 54.4              |
| C <sub>18</sub> OBCb | 5×cmc         | 0.246 | 17.2         | 12.9              | 84.6         | 87.1              |
|                      | 10×cmc        | 0.342 | 23.5         | 15.6              | 89.1         | 84.4              |
|                      | 20×cmc        | 0.407 | 41.1         | 49.2              | 151.9        | 50.8              |

## 5. The composition of the used formation brine

Table S2 The composition of the used formation brine.

| Na <sup>+</sup> +K <sup>+</sup><br>(mg/L) | Mg <sup>2+</sup><br>(mg/L) | Ca <sup>2+</sup><br>(mg/L) | Cl <sup>-</sup><br>(mg/L) | SO <sub>4</sub> <sup>2-</sup><br>(mg/L) | HCO <sub>3</sub> <sup>-</sup><br>(mg/L) | CO <sub>3</sub> <sup>2-</sup><br>(mg/L) |
|-------------------------------------------|----------------------------|----------------------------|---------------------------|-----------------------------------------|-----------------------------------------|-----------------------------------------|
| 2992.22                                   | 21.07                      | 86.83                      | 2735.23                   | 3.49                                    | 3596.11                                 | 7636.89                                 |
